# Supplementary material
Source: Springer Nature journal article supplement (https://www.springermedizin.de/resource/supplementary/12865_2009_280_MOESM3_ESM.pdf/9427668)

**A**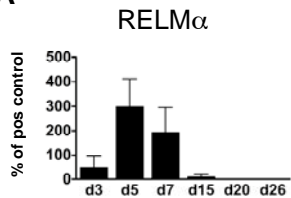**B**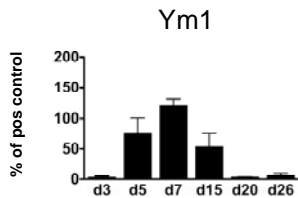**C**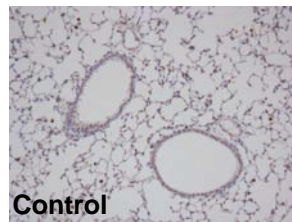**D**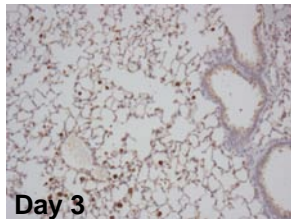**E**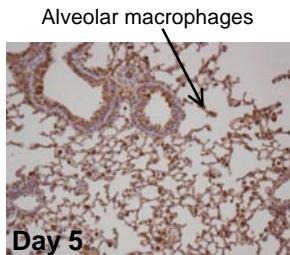**F**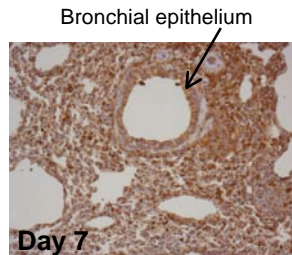**G**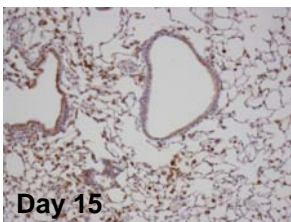**H**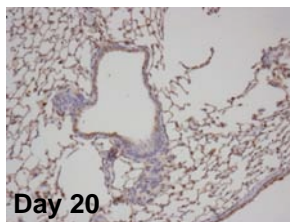**I**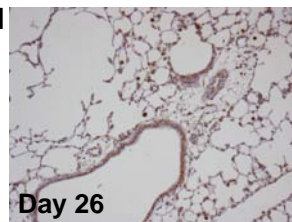

Supplement: MOESM3 [file 9427668]
